# Supplementary material
Source: Springer Nature journal article supplement (https://www.springermedizin.de/resource/supplementary/12936_2012_2119_MOESM6_ESM.pdf/9542630)

## Flow-through fraction

## Eluted fraction

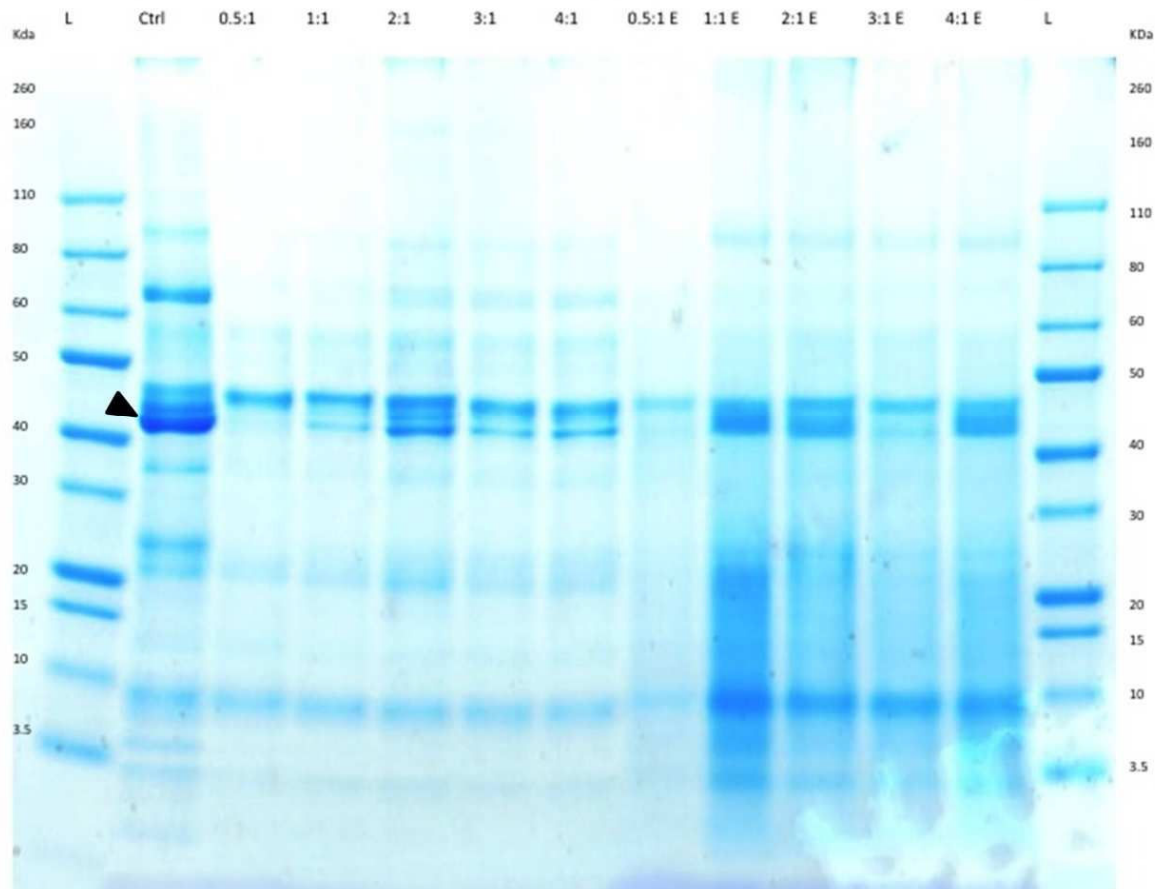

Supplement: MOESM6 [file 9542630]
